# Supplementary material for: Optical, electrical and photoelectric properties of layered-perovskite ferroelectric Bi2WO6 crystals
Source: Royal Society of Chemistry journal article supplement (doi:10.1039/c6tc02069k), 2016-01-01
Supplement: c6tc02069k1.pdf [file c6tc02069k1.pdf]

## Supplementary Information

### Optical, Electrical and Photoelectric Properties of Layered-perovskite Ferroelectric $\text{Bi}_2\text{WO}_6$ Crystals

*Xitao Liu, Peiqing Long, Zhihua Sun and Zhiguo Yi\**

Key Laboratory of Optoelectronic Materials Chemistry and Physics, Fujian Institute of Research on the Structure of  
Matter, Chinese Academy of Sciences, Fuzhou 350002, China

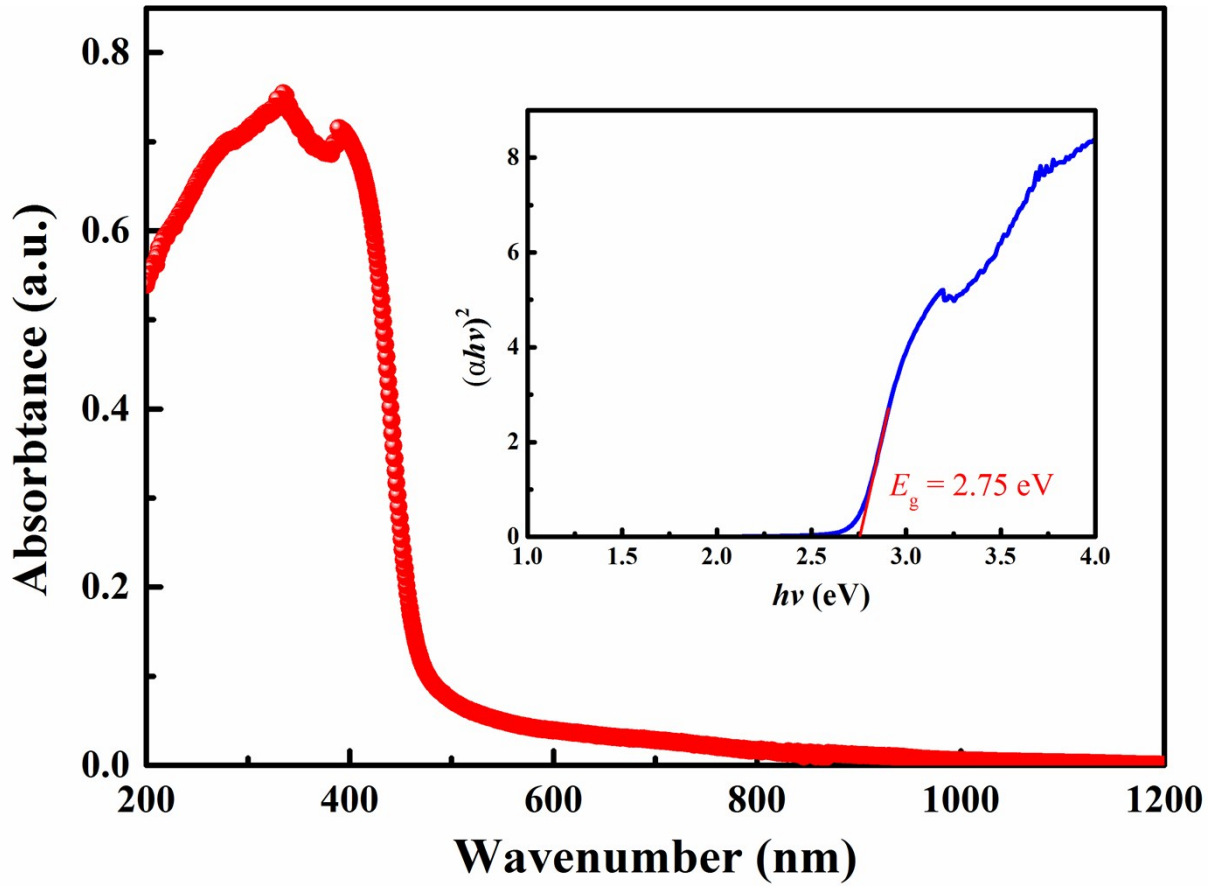

Fig. S1 The determination of the band gap for  $\text{Bi}_2\text{WO}_6$ .

Near the cut-off of the optical transmission, the band gap, the absorption and the wave frequency obey the equation:

$$\alpha h\nu = A(h\nu - E_g)^{n/2},$$

where  $\alpha$ ,  $\nu$ ,  $A$ , and  $E_g$  are absorption coefficient, light frequency, proportionality constant, and band gap, respectively. In the equation,  $n$  decides the characteristics of the transition in a semiconductor ( $n=1$ , direct absorption;  $n=4$ , indirect absorption). The values of  $n$  and  $E_g$  were determined by the following steps: first, plot  $\ln(\alpha h\nu)$  vs  $\ln(h\nu - E_g)$  using the approximate  $E_g$  value, and then determine the value of  $n$  with the slope of the straight line near the band edge; second, plot  $(\alpha h\nu)^{1/n}$  vs  $h\nu$  and then obtain the band gap  $E_g$  by extrapolating the straight line to the  $h\nu$  axis intercept.

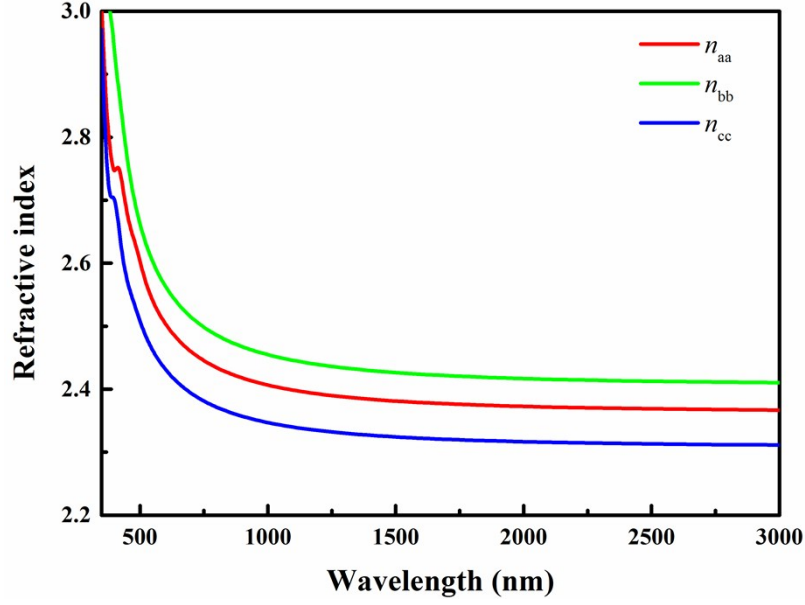

Fig. S2 Calculated refractive index of  $\text{Bi}_2\text{WO}_6$ .

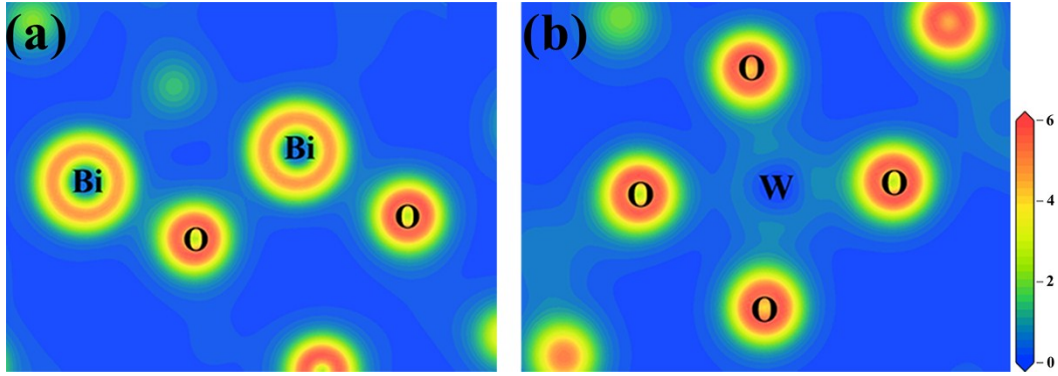

Fig. S3 Electric charge density distribution of  $\text{Bi}_2\text{WO}_6$ : (a) Bi-O and (b) W-O.

The birefringence of nonlinear optical material is a very important parameter for phase-matching range. One can see that the calculated birefringence is about 1.1-1.5 for BWO (Fig. S2). Fig. S3 shows the valence charge density around the constituent ions in BWO crystals. As we can see, the electrons around the Bi-O and W-O bonds form orbitals with strong covalent characteristics, while the charge densities located on the other cations and groups are almost spherical which lead the differences response to the incident light. The energy difference between the covalent-interaction Bi-O and W-O bond states along different directions play a crucial role in the origin of the large birefringence for the BWO crystals.
